# Supplementary material
Source: PubMed Central journal article supplement (PMC2721638)
Supplement: ja804530w_si_001.pdf [file ja804530w_si_001.pdf]

# New aldehyde tag sequences identified by screening formylglycine generating enzymes *in vivo* and *in vitro*

Jason S. Rush and Carolyn R. Bertozzi

*Departments of Chemistry and Molecular and Cell Biology and Howard Hughes Medical Institute,  
University of California, Berkeley, California 94720*

## Table of Contents

|                                         |         |
|-----------------------------------------|---------|
| • General methods                       | S2      |
| • Synthesis of <b>1</b>                 | S3      |
| • Experimental procedures               | S3-S8   |
| • MS of FGE reactions                   | S10-S13 |
| • NMR spectra of <b>S3</b> and <b>1</b> | S13-S17 |
| • References                            | S18     |

## General methods

All reagents and solvents were obtained from commercial suppliers and used without further purification unless otherwise noted. Dichloromethane (DCM) was dried by passage over a column of activated alumina under a N<sub>2</sub> atmosphere. Reactions were monitored via thin-layer chromatography on Analtech uniplat<sup>®</sup> silica gel plates and visualized using UV absorption and Hanessian's ceric ammonium

molybdate stain. All solvents were removed using rotary evaporation under reduced pressure followed by static high vacuum. All  $^1\text{H}$  and  $^{13}\text{C}$  NMR were recorded on a Bruker AM-400<sup>®</sup> machine. Shifts are reported in  $\delta$  values and referenced to the solvent peaks, either 7.26 ppm and 77.0 ppm for  $\text{CDCl}_3$ , or 1.94 ppm and 118.7 ppm for  $\text{CD}_3\text{CN}$  ( $^1\text{H}$  and  $^{13}\text{C}$  signals, respectively). Coupling constants ( $J$ ) are reported in Hz. Fast atom bombardment (FAB) spectra were obtained from the UC Berkeley Mass Spectrometry Laboratory. Electrospray mass spectrometry (ESI-MS) was performed on a Hewlett-Packard 1100 mass spectrometer. Matrix-assisted laser desorption/ionization-time of flight (MALDI-TOF) was performed on a Applied Biosystems Voyager DE Pro mass spectrometer. Quantitative amino acid analysis (QAAA) was performed at the Molecular Structure Facility at UC Davis. High-pressure liquid chromatography (HPLC) was performed on a Rainin Dynamax SD-200 HPLC system using Microsorb and Dynamax C18 reversed-phase columns (analytical: 4.6 x 250 mm, 1 mL/min; semi-preparative: 10 x 250 mm, 3 mL/min) and UV detection was performed with a Rainin Dynamax UV-1 detector. *S. coelicolor* and *M. tuberculosis* FGEs were expressed in *E. coli* as N- and C-terminal His<sub>6</sub> fusions, respectively, and purified as previously described.<sup>1</sup> Site directed mutagenesis was accomplished using a modified QuikChange (Stratagene) protocol<sup>2</sup> using previously disclosed plasmids.<sup>1</sup> DNA sequencing was used to confirm the fidelity of gene products. In-gel fluorescence was imaged using a Typhoon 9410 scanner (GE Healthcare).

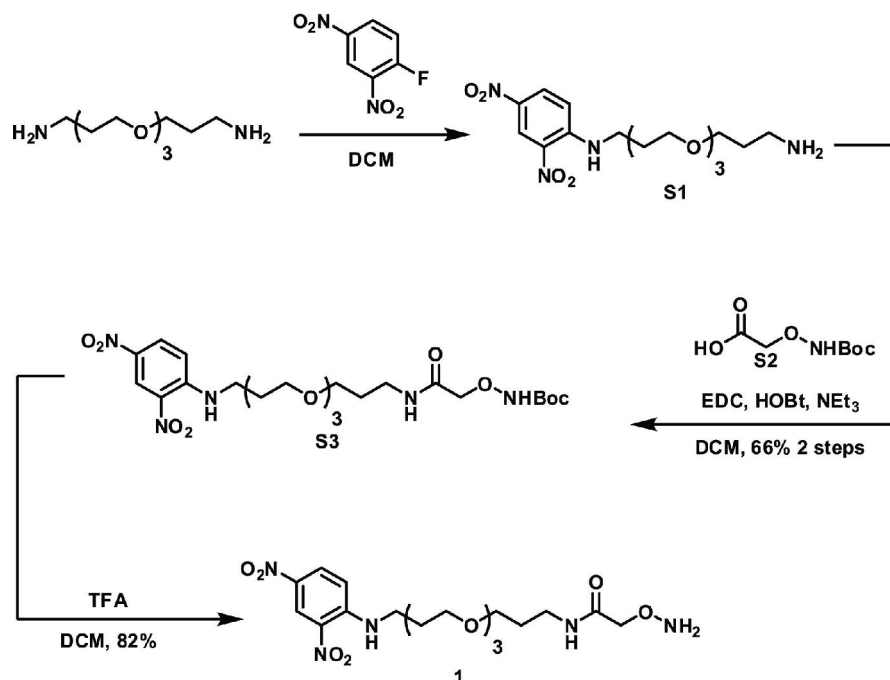

Scheme S1. Synthesis of compound **1**.

## Experimental procedures

***N*-(3-(2-(2-(3-Aminopropoxy)ethoxy)ethoxy)propyl)-2,4-dinitroaniline (**S1**)**. A flame dried flask under N<sub>2</sub> was charged with 4,7,10-Trioxa-1,13-tridecanediamine (1.07 g, 4.84 mmol) and DCM (15 mL). 1-Fluoro-2,4-dinitrobenzene (150 mg, 0.8 mmol) in DCM (15 mL) was added dropwise over 15 min via an addition funnel. After 2.5 h the reaction was transferred to a separatory funnel, washed with H<sub>2</sub>O (3 x 20 mL) and brine (2 x 20 mL), then dried (K<sub>2</sub>CO<sub>3</sub>), filtered and concentrated to afford a yellow syrup which was used without further purification.

***tert*-Butyl 16-(2,4-dinitrophenylamino)-2-oxo-7,10,13-trioxa-3-azahexadecyloxycarbamate (**S3**)**. A flame dried flask under a N<sub>2</sub> atmosphere was charged with **S2** (229 mg, 1.20 mmol), *N*-Ethyl-*N'*-(3-dimethylaminopropyl)carbodiimide hydrochloride (EDC, 230 mg, 1.20 mmol), 1-hydroxybenzotriazole hydrate (HOBt, 162 mg, 1.20 mmol) triethylamine (NEt<sub>3</sub>, 0.22 mL, 1.6 mmol), and DCM (1.6 mL). After

stirring for 20 min at rt, the solution was added to another flame-dried flask under N<sub>2</sub> containing **S1** and the yellow solution was stirred overnight. The reaction was then diluted with DCM (20 mL) and washed with 0.1 M HCl (2 x 10 mL), satd. NaHCO<sub>3</sub> (2 x 10 mL), and brine (1 x 10 mL), then dried (Na<sub>2</sub>SO<sub>4</sub>), filtered and concentrated. The crude material was purified on silica with two successive columns. The first with EtOAc and the second with DCM/EtOH (30:1) to afford **S3** (294 mg, 66% over 2 steps). R<sub>f</sub> = 0.2 (EtOAc); <sup>1</sup>H NMR(400 MHz, CDCl<sub>3</sub>) δ: 9.06 (1H, d, *J* = 2.8), 8.89 (1H, s), 8.21 (1H, dd, *J* = 10.0, 2.4), 8.19 (1H s), 7.95 (1H, s), 6.95 (1H, d, *J* = 9.6), 4.26 (2H, s), 3.67-3.5 (14H, m), 3.36 (2H, q, *J* = 6.4), 2.00 (2H, m), 1.78 (2H, m), 1.43 (9H, s); <sup>13</sup>C NMR (100 MHz, CDCl<sub>3</sub>) δ: 168.7, 157.5, 148.3, 135.6, 130.2, 130.1, 124.2, 113.8, 82.5, 75.7, 70.5, 70.4, 70.3, 70.0, 69.4, 69.1, 41.8, 36.8, 29.0, 28.5, 28.0; HRMS (FAB+) calcd. for C<sub>23</sub>H<sub>38</sub>N<sub>5</sub>O<sub>11</sub> (MH)<sup>+</sup>: 560.2572, found: 560.2568.

**2-(Aminoxy)-N-(3-(2-(2-(3-(2,4-dinitrophenylamino)propoxy)ethoxy)ethoxy)propyl)acetamide (1).** A flask under a N<sub>2</sub> atmosphere was charged with **S3** (82 mg, 0.15 mmol), DCM (3 mL) and TFA (1 mL) then stirred at rt for 4 h. The reaction was concentrated and the crude material was purified by silica gel chromatography eluting with DCM/EtOH (20:1) to afford **1** (55 mg, 82%). R<sub>f</sub> = 0.1 (20:1 DCM/EtOH); <sup>1</sup>H NMR(400 MHz, CD<sub>3</sub>CN) δ: 8.92 (1H, d, *J* = 0.7), 8.81 (1H, s), 8.21 (1H, dd, *J* = 2.5, 0.7), 7.09 (1H, d, *J* = 2.4), 6.95 (1H, s), 5.95 (2H, s), 3.94 (2H, s), 3.62-3.50 (12H, m), 3.48 (2H, t, *J* = 1.5), 3.26 (2H, q, *J* = 1.5), 1.97 (2H, m), 1.70 (2H, m); <sup>13</sup>C NMR (100 MHz, CD<sub>3</sub>CN) δ: 171.1, 150.0, 136.7, 131.4, 131.3, 125.1, 116.0, 76.0, 71.53, 71.51, 71.4, 71.3, 70.5, 70.1, 42.9, 37.7, 30.7, 29.7; HRMS (FAB+) calcd. for C<sub>18</sub>H<sub>30</sub>N<sub>5</sub>O<sub>9</sub> (MH)<sup>+</sup>: 460.2044, found: 460.2043.

## Library synthesis

The library members were synthesized on Fmoc-Lys(biotin) Wang resin (0.03 mmol) using *N*<sup>α</sup>-Fmoc protected amino acids and DIC/HOBt ester activation in NMP. A five-fold excess of amino acid was used in each coupling except for the Thr-Pro step, which was accomplished using Fmoc-Thr(OtBu)OH (0.3 mmol), HATU (0.28 mmol), and diisopropylethylamine (0.56 mmol) followed by agitation for 10 h. Fmoc removal was accomplished using 30% piperidine in NMP. The peptides were terminally acylated with pyridine/acetic anhydride (2:1) for 1 h at rt. Peptide cleavage/deprotection was accomplished by treatment with TFA/H<sub>2</sub>O/EDT/TIS (94:2.5:2.5:1) for 3 h at rt. The peptides were precipitated from cold MTBE, dissolved in H<sub>2</sub>O and lyophilized. The crude peptides were purified by semi-preparative RP-HPLC using CH<sub>3</sub>CN/H<sub>2</sub>O gradients with 0.1% TFA. Peptide concentrations were determined via QAAA. Additionally, an authentic FGly containing sequence was synthesized using previously reported methods.

3

## Functionality of *in vitro* FGE assay

Reactions containing FGly-containing peptide, or the C→A variant, (333 μM) and compound **1** (1.67 mM) in H<sub>2</sub>O with 33 mM KOAc pH = 4.6, at a final volume of 6 μL or 16.5 μL (FGly and C→A, respectively) were incubated at 37 °C for 3 h. The FGly peptide containing reaction was then diluted to 200 μL while the alanine peptide containing reaction was diluted to 550 μL, both with H<sub>2</sub>O. Varying ratios of the two reactions were mixed and 50 μL of the mixtures were then loaded onto a 96-well NeutrAvidin plate which had been washed 3x with 200 μL wash buffer (25 mM Tris, 150 mM NaCl, 0.5% BSA (w/v), and 0.05% Tween20 (v/v), pH = 7.2), then incubated with 50 μL of 100 μM MeONH<sub>2</sub> in 0.1 M KOAc, pH = 4.6, for 15 min at rt, then washed 3x again with 200 μL wash buffer. After 1 h at rt in the absence of light, the wells were washed 3x with 200 μL wash buffer and 100 μL of α-DNP-AlkPhos (Sigma) diluted 1:5000 in wash buffer was added. The plate was incubated 1 h at rt in the absence of light, washed 3x with 200 μL

wash buffer, after which 200  $\mu\text{L}$  of 1 mg/mL *p*-nitrophenyl phosphate (pNPP) in reaction buffer (10% diethanolamine, 0.5 mM  $\text{MgCl}_2$ , pH = 9.8) was added. After 5-10 min at rt in the absence of light, the reaction was quenched with 50  $\mu\text{L}$  of 3 M KOH and  $\text{Abs}_{405}$  was read using a UV/VIS spectrophotometric microtiter plate reader.

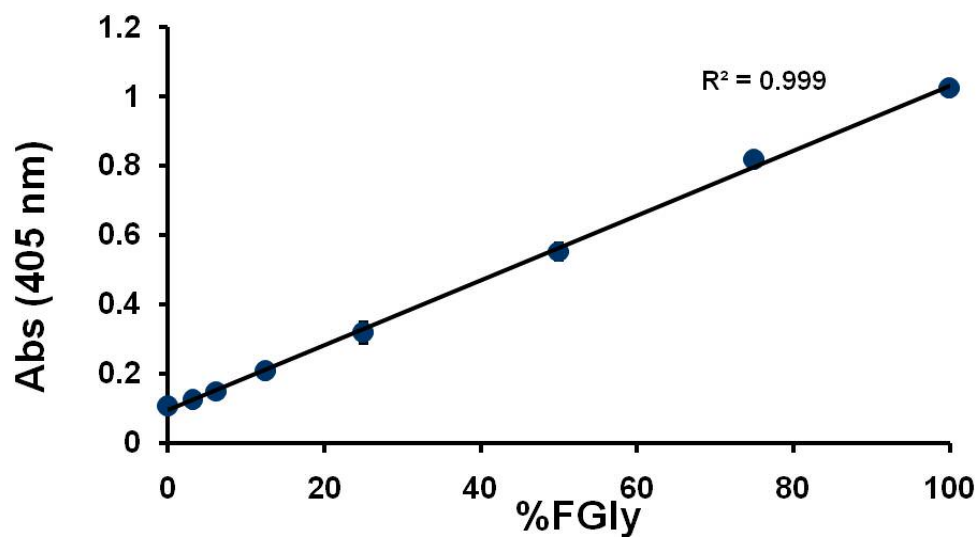

Figure S1. Assay response to varying ratios of FGly. Values and error represent the average and standard deviation of the 3 replicates.

### **Reaction of peptides with FGE**

Reactions containing 125  $\mu$ M biotinylated peptide, 780 nM FGE, 50 mM Tris, 68 mM NaCl, 0.2 mg/mL BSA and 2 mM DTT, pH = 9 were assembled in the following manner. A solution of biotinylated peptide (2.5  $\mu$ L, 1 mM) and DIH<sub>2</sub>O (12.5  $\mu$ L) was warmed to 30°C. The reaction was initiated by addition of a mixture of 10X buffer (2  $\mu$ L, 0.5 M Tris, 680 mM NaCl, 2 mg/mL BSA, 20 mM DTT, pH = 9), FGE (0.04  $\mu$ L, 14.5 mg/mL) and H<sub>2</sub>O (2.96  $\mu$ L). Control reactions lacking FGE contained 10X buffer (2  $\mu$ L) and H<sub>2</sub>O (3  $\mu$ L) in addition to peptide. After 20 min at 30 °C the reactions were quenched by the addition of 10  $\mu$ L 1M KOAc pH = 4.6.

### **Analysis of FGE-modified peptides**

Reactions containing 7.2  $\mu$ L of the quenched enzymatic reactions and 1  $\mu$ L of 5 mM compound **1** were incubated at 37 °C for 3 h then diluted to a final volume of 60  $\mu$ L. 50  $\mu$ L were then loaded onto a 96-well NeutrAvidin plate which had been pre-treated in the following manner. The plate was rinsed 3x with 200  $\mu$ L of wash buffer, then incubated with 50  $\mu$ L of 100  $\mu$ M MeONH<sub>2</sub> in 0.1 M KOAc, pH = 4.6, for 15 min at rt, then rinsed again 3x with 200  $\mu$ L of wash buffer. After 1 h at rt in the absence of light, the plate was rinsed 3x with 200  $\mu$ L of wash buffer and 100  $\mu$ L of  $\alpha$ -DNP-AlkPhos (Sigma) diluted 1:5000 in wash buffer was added. The plate was incubated 1 h at rt in the absence of light, rinsed 3x with 200  $\mu$ L of wash buffer, after which, 200  $\mu$ L of 1 mg/mL pNPP in reaction buffer was added. After 5-10 min at rt in the absence of light, the reaction was quenched with 50  $\mu$ L of 3 M KOH and Abs<sub>405</sub> was read using a UV/VIS spectrophotometric microtiter plate reader. Signal from reactions without FGE was subtracted as background and % conversion was calculated based on the wild-type sequence for the enzyme.

### Expression and chemoselective labeling of ald<sub>6</sub>MBP and its related mutants

Mutations to the previously described ald<sub>6</sub>MBP gene were performed as described in the general methods using the oligonucleotides in supplementary table 1. A plasmid containing ald<sub>6</sub>MBP, or a mutant thereof, were transformed into BL21(DE3) cells (Invitrogen). Clonal populations were used to seed 5 mL cultures of LB media containing kanamycin at 37 °C. When OD<sub>600</sub> = 0.5 the cultures were cooled to rt and MBP expression was induced with 1 mM IPTG. The cultures were agitated at rt overnight, then lysed using the BugBuster reagent (Novagen). MBP was isolated using nickel spin columns (Qiagen) according to the manufacturer's instructions. Protein concentration was normalized using the DC Protein Assay (Bio-Rad) and labeling using Alexa Fluor 647 C5-aminoxyacetamide was accomplished as previously reported.<sup>4</sup>

#### Supplementary table 1

| Primer        | Sequence (5'→3')            |
|---------------|-----------------------------|
| MBP LCTASR 5' | GCACAGCATCGCGGTGAG          |
| MBP LCTASR 3' | GCGATGCTGTGCACAGGG          |
| MBP LATASR 5' | GCCACAGCATCGCGGTGAGCG       |
| MBP LATASR 3' | GCGATGCTGTGGCCAGGGATC       |
| MBP LCTASA 5' | GCATCGGCGTGAGCGGCCGCAC      |
| MBP LCTASA 3' | GCCGCTCACGCCGATGCTGTGCACAGG |
| MBP LATASA 5' | CACAGCATCGGCGTGAGCGGCCGCAC  |
| MBP LATASA 3' | CGCTCACGCCGATGCTGTGGCCAGGG  |

#### Mass spectrometry confirmation of FGly formation and reactivity

Enzymatic reactions were performed as above but quenched by the addition of 1 μL 10% TFA. The reactions were desalted on C18 ZipTips and eluted with 3 μL CH<sub>3</sub>CN with 0.1% TFA. 1 μL of this was mixed with 1 μL of 10 mM MeONH<sub>2</sub> and the reaction was incubated at rt for 30 min. The reaction was then mixed 1:1 with matrix solution (10 mg/mL α-cyano-4-hydroxy-cinnamic acid in 50% CH<sub>3</sub>CN, 0.1%



TFA) and analyzed by MALDI-TOF MS. Samples of the mass spectra of the reactions are shown in Figs. S2-S4.

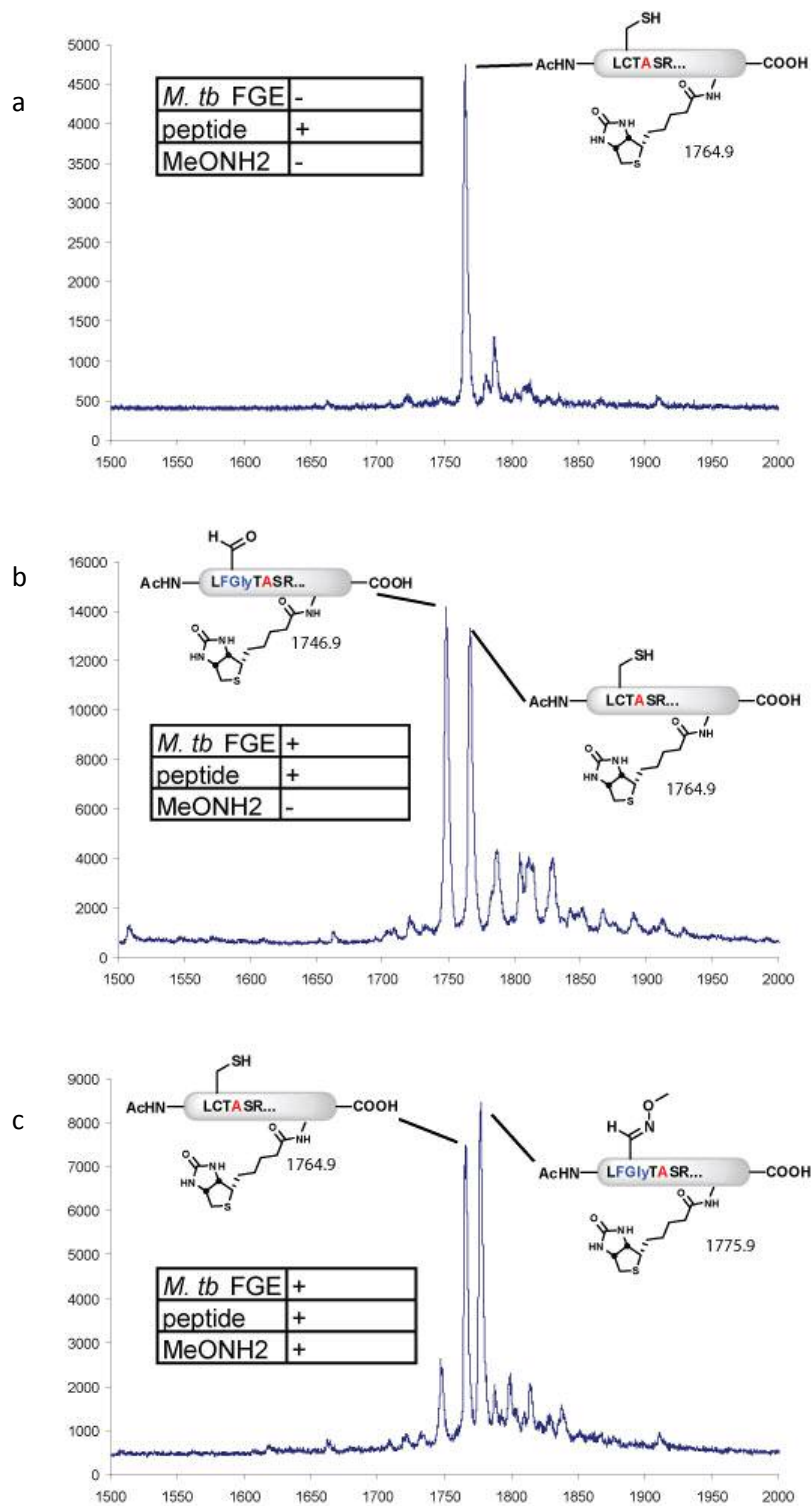

Figure S2. Mass spectra of LCTASRGSLFTGR from FGE reactions before or after treatment with MeONH<sub>2</sub>. (a) Peptide in the absence of FGE. (b) Peptide in the presence of FGE. (c) Peptide after reaction with MeONH<sub>2</sub>

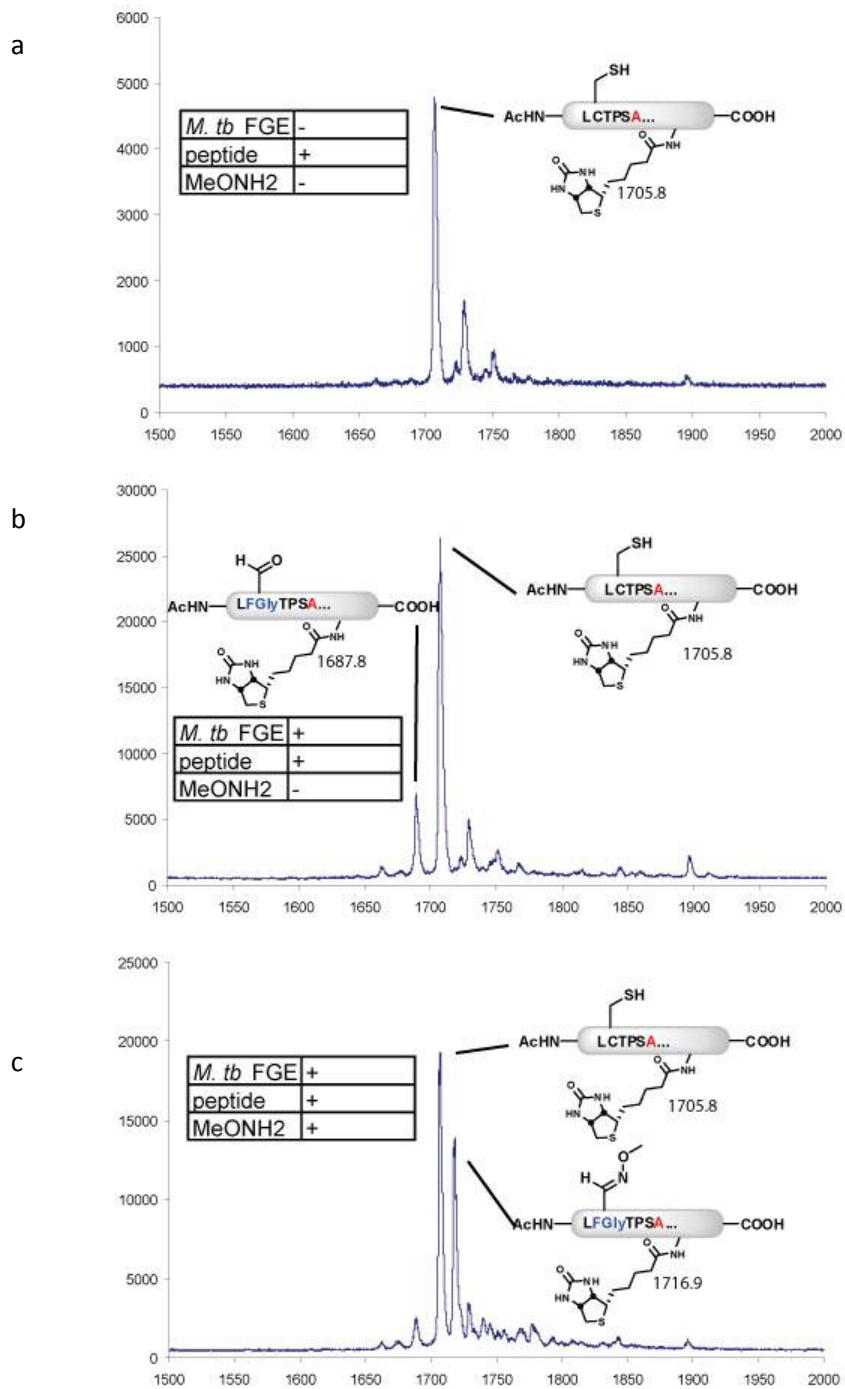

Figure S3. Mass spectra of LCTPSAGSLFTGR from FGE reactions before or after treatment with MeONH<sub>2</sub>. (a) Peptide in the absence of FGE. (b) Peptide in the presence of FGE. (c) Peptide after reaction with MeONH<sub>2</sub>

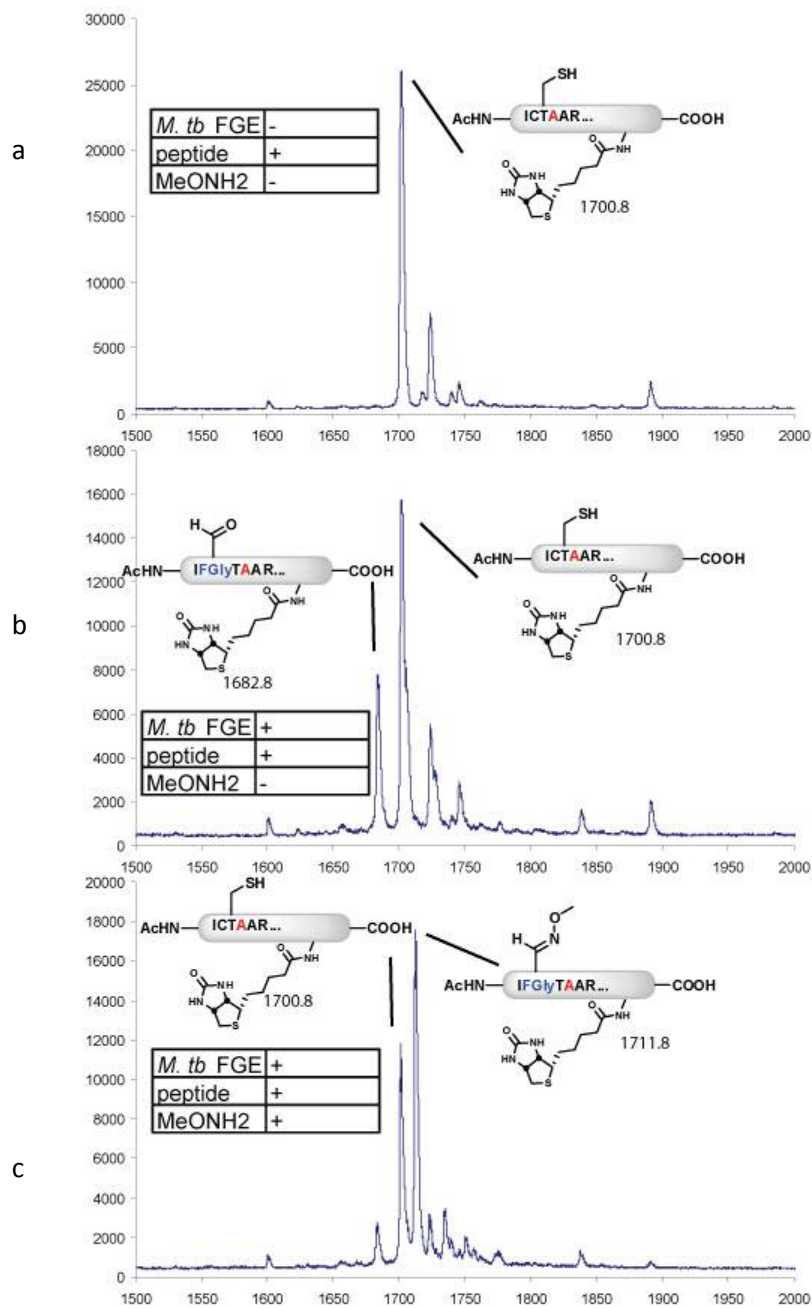

Figure S4. Mass spectra of ICTAARASLLTQG from FGE reactions before or after treatment with MeONH<sub>2</sub>. (a) Peptide in the absence of FGE. (b) Peptide in the presence of FGE. (c) Peptide after reaction with MeONH<sub>2</sub>

JSR210c

9.067  
9.060  
8.885  
8.226  
8.220  
8.203  
8.196  
8.185  
8.138  
7.946  
7.260  
6.958  
6.934  
4.604  
4.507  
4.257  
3.730  
3.679  
3.670  
3.663  
3.656  
3.649  
3.638  
3.632  
3.625  
3.611  
3.597  
3.578  
3.571  
3.565  
3.555  
3.544  
3.535  
3.528  
3.521  
3.515  
3.506  
3.445  
3.431  
3.379  
3.363  
3.363  
3.348  
3.332  
3.188  
3.173  
2.246  
2.174  
2.033  
2.018  
2.003  
1.989  
1.974  
1.806  
1.790  
1.775  
1.759  
1.743  
1.614  
1.584  
1.524  
1.427  
1.266  
1.183  
1.166  
0.827  
0.809

Current Data Parameters  
USER JSR  
NAME JSR210c  
EXPNO 1  
PROCNO 1

F2 - Acquisition Parameters  
Date\_ 2009110  
Time 0.01  
INSTRUM AVB-400  
PROBHD 5 mm PABBO BB-  
PULPROG zg30  
TD 65536  
SOLVENT CDCl3  
NS 8  
DSH 8278.146 Hz  
SWH 0.126314 Hz  
FIDRES 3.9584243 sec  
AQ 35.9  
RG 60.400 use  
DE 6.00 use  
TE 300.2 K  
JMOD 0.000000 sec  
MCWREK 0.01500000 sec

===== CHANNEL f1 =====  
NUC1 1H  
P1 8.20 use  
PL1 3.00 dB  
SFO1 400.1324710 MHz

F2 - Processing parameters  
SI 32768  
SF 400.1300172 MHz  
WDW EM  
SSR n

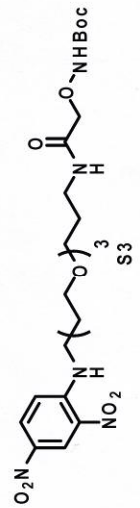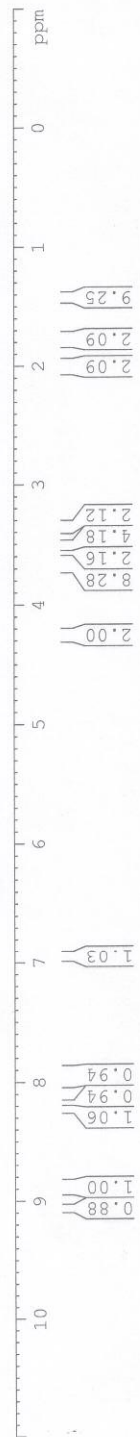

JSR201c

Current Data Parameters  
Date: 20080110  
Time: 16.04  
INSTRUM: AVB-400  
PROBHD: 5 mm PABBO BB-  
TULPROG: zgpg30  
PULPROG: zgpg30  
SOLVENT: CDCl3  
NS: 126  
DS: 0  
SWH: 23880.814 Hz  
FIDRES: 0.365918 Hz  
AQ: 1.3664756 sec  
RG: 16384  
RG2: 21684 usec  
DE: 6.00 usec  
TE: 294.5 K  
D1: 1.50000000 sec  
d11: 0.03000000 sec  
DELTA: 1.39999998 sec  
MCRET: 0.00000000 sec  
PCWRR: 0.01500000 sec

Acquisition Parameters  
Date: 20080110  
Time: 16.04  
INSTRUM: AVB-400  
PROBHD: 5 mm PABBO BB-  
TULPROG: zgpg30  
PULPROG: zgpg30  
SOLVENT: CDCl3  
NS: 126  
DS: 0  
SWH: 23880.814 Hz  
FIDRES: 0.365918 Hz  
AQ: 1.3664756 sec  
RG: 16384  
RG2: 21684 usec  
DE: 6.00 usec  
TE: 294.5 K  
D1: 1.50000000 sec  
d11: 0.03000000 sec  
DELTA: 1.39999998 sec  
MCRET: 0.00000000 sec  
PCWRR: 0.01500000 sec

Processing parameters  
SI: 32768  
SF: 100.6127832 MHz  
WDW: EM  
SSB: 0  
LB: 1.50 Hz  
GB: 0  
PC: 4.00

CHANNEL f1  
NUC1: 13C  
P1: 8.50 usec  
PL1: -2.00 dB  
SFO1: 100.6228298 MHz

CHANNEL f2  
WALT16  
NUC2: 1H  
PCPD2: 70.00 usec  
PL2: -3.00 dB  
PL12: 16.00 dB  
PL13: 16.00 dB  
SFO2: 400.1316005 MHz

82.46  
77.31  
77.00  
76.68  
75.74  
70.47  
70.36  
70.25  
70.00  
69.40  
69.11

168.70  
157.54  
148.31  
135.57  
130.15  
130.08  
124.15  
113.84

70.472  
70.358  
70.250  
70.005  
69.401  
69.107

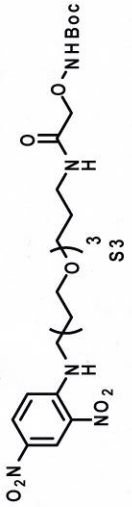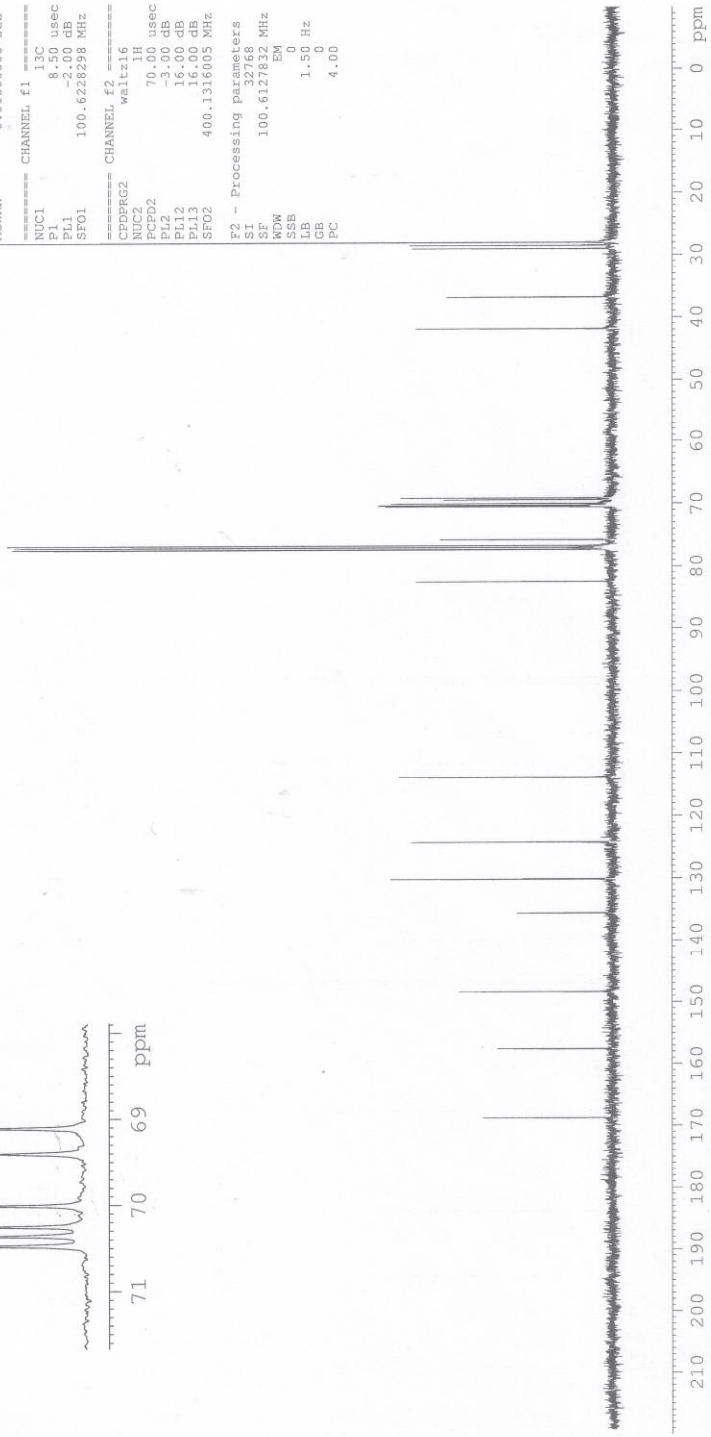

JSRV35b

8.921  
8.914  
8.810  
8.225  
8.218  
8.200  
8.194  
7.101  
7.077  
6.945  
6.560  
5.952  
4.901  
4.401  
4.378  
4.296  
4.116  
4.024  
3.937  
3.854  
3.754  
3.679  
3.611  
3.596  
3.590  
3.582  
3.569  
3.557  
3.541  
3.526  
3.512  
3.491  
3.476  
3.461  
3.435  
3.419  
3.350  
3.281  
3.264  
3.249  
3.233  
3.233  
2.233  
1.971  
1.955  
1.940  
1.926  
1.911  
1.877  
1.860  
1.846  
1.817  
1.798  
1.783  
1.728  
1.712  
1.696  
1.680  
1.665  
1.536  
1.375  
1.248  
1.107  
0.869  
0.852  
0.745

Current Data Parameters  
USER JSR  
EXPNO JSRV34d  
PROCNO 1

F2 - Acquisition Parameters  
Date\_ 20080109  
Time 16.36  
INSTRUM AVE-600  
PROBHD 5 mm PABBO-60  
PULPROG zg30  
TD 65536  
SOLVENT CDCl3  
NS 8  
DS 0  
SWH 8278.146 Hz  
FIDRES 0.1166314 Hz  
AQ 3.956453 sec  
RG 453  
DW 60.400 use  
DE 6.00 use  
TE 294.1 K  
D1 1.0000000 sec  
MCREST 0.0000000 sec  
MCWPRK 0.01500000 sec

CHANNEL f1  
NUC1 1H  
P1 8.20 use  
PL1 -3.00 dB  
SFO1 400.1324710 MHz  
F2 - Processing parameters  
SF 400.1300112 MHz  
WDW EM  
SSR 0

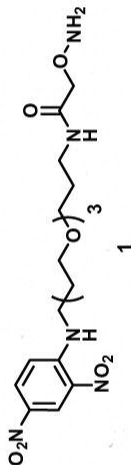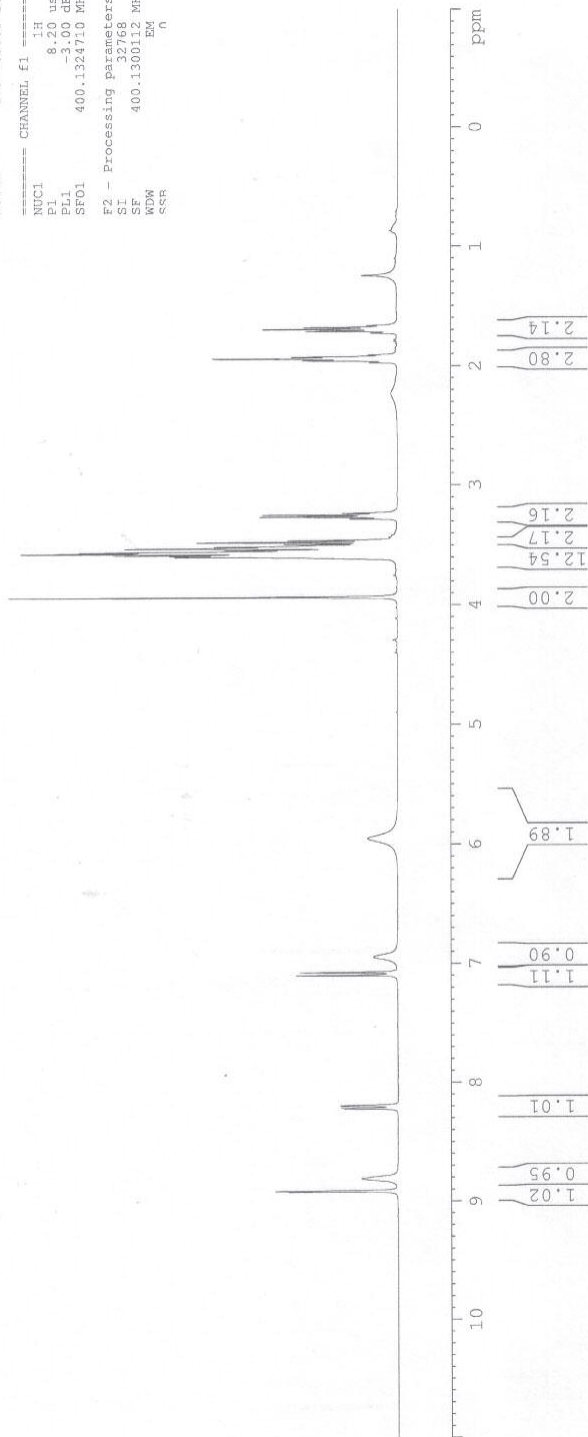

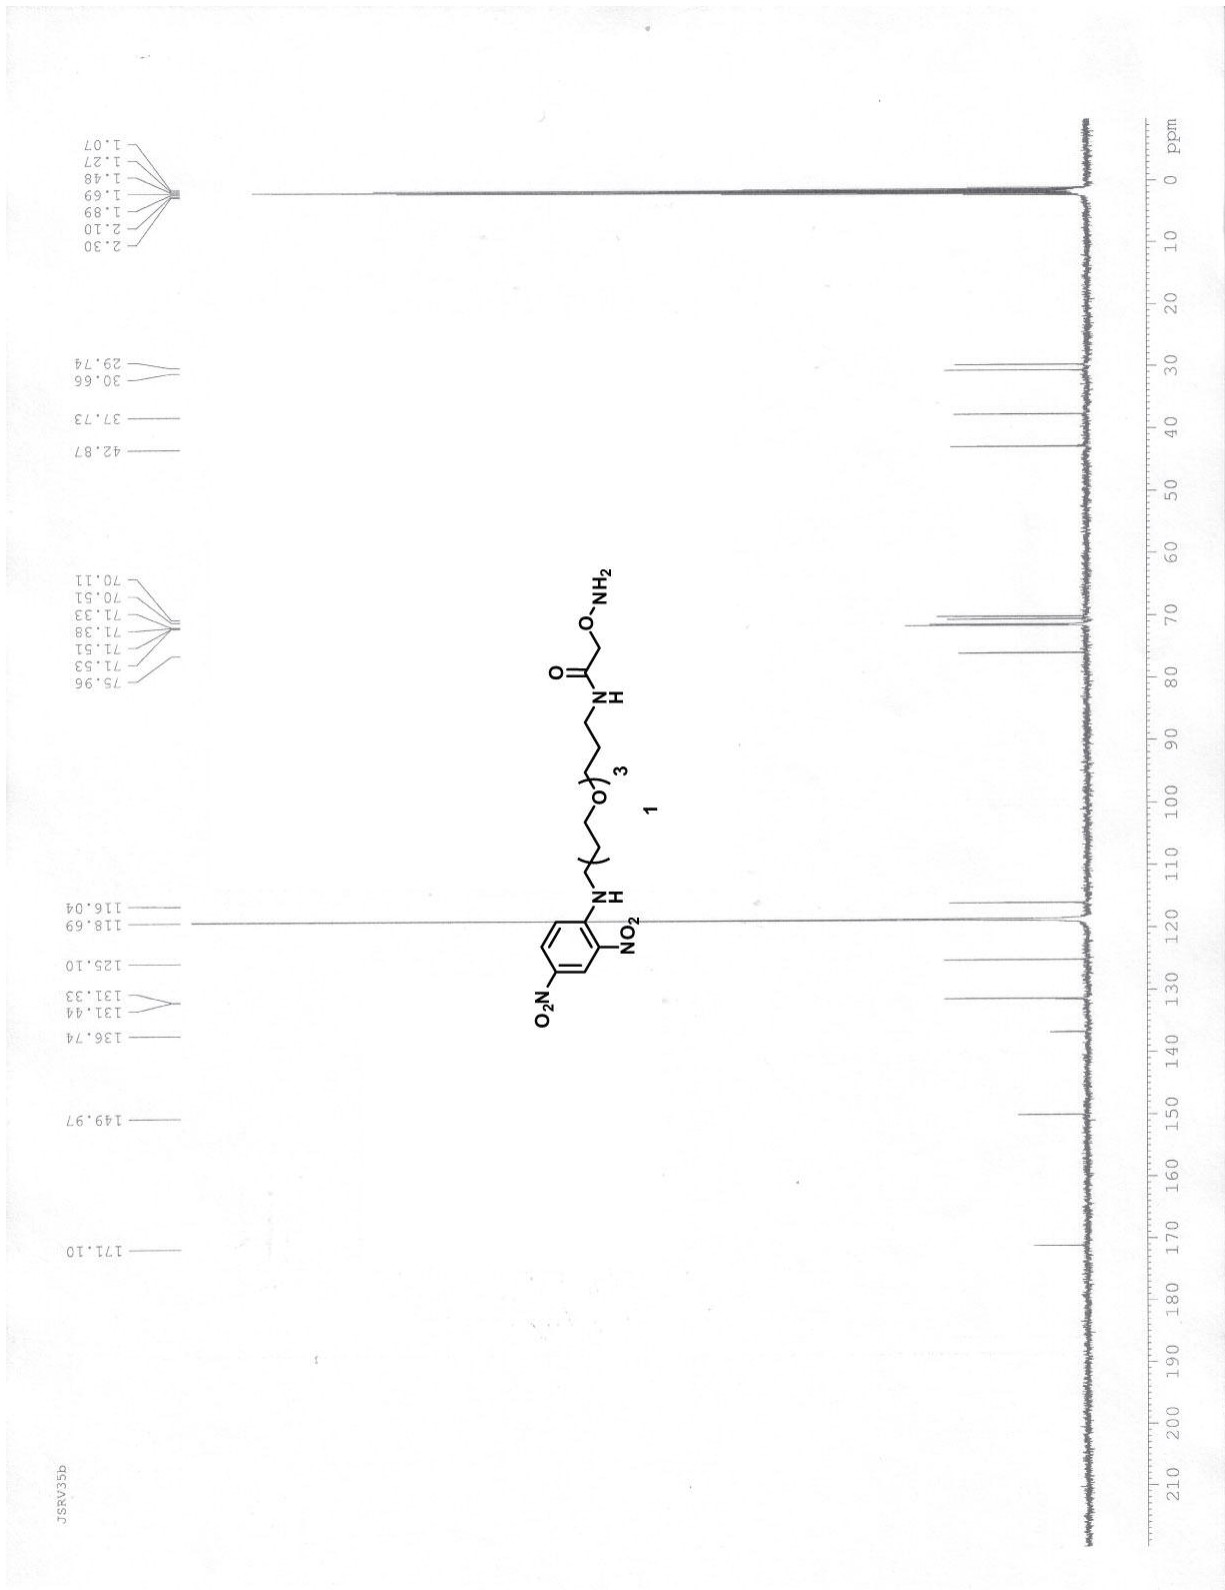



## Supplemental references

1. Carlson, B. L.; Ballister, E. R.; Skordalakes, E.; King, D. S.; Breidenbach, M. A.; Gilmore, S. A.; Berger, J. M.; Bertozzi, C. R. *J. Biol. Chem.* **2008**, *283*, 20117-20125.
2. Zheng, L.; Baumann, U.; Reymond, J. L. *Nucleic Acids Res.* **2004**, *32*, e115.
3. Rush, J.; Bertozzi, C. R. *Org. Lett.* **2006**, *8*, 131-134.
4. Carrico, I. S.; Carlson, B. L.; Bertozzi, C. R. *Nat. Chem. Biol.* **2007**, *3*, 321-322.
